# Supplementary material
Source: publisher site journal article supplement (https://www.dovepress.com/get_supplementary_file.php?f=278415.docx)
Supplement: Supplementary file 1 [file get_supplementary_file.php]

| variables | Complexity  (nucleotide) | | Complexity  (amino acid) | | Genetic distance(nucleotide) | | Genetic distance  (amino acid level) | | dS  (10-3substitutions/site) | | dN  (10-3 substitutions/site) | | dN/dS | |
| --- | --- | --- | --- | --- | --- | --- | --- | --- | --- | --- | --- | --- | --- | --- |
| *r* | P | *r* | P | *r* | P | *r* | P | *r* | P | *r* | P | *r* | P |
| ALT | 0.162 | 0.473 | 0.239 | 0.283 | 0.082 | 0.717 | 0.095 | 0.673 | 0.014 | 0.952 | 0.140 | 0.952 | 0.136 | 0.953 |
| AST | -0.112 | 0.620 | 0.125 | 0.580 | 0.053 | 0.814 | 0.136 | 0.548 | -0.064 | 0.776 | 0.114 | 0.623 | -0.172 | 0.766 |
| sCD14 | 0.127 | 0.340 | 0.119 | 0.436 | -0.221 | 0.323 | -0.219 | 0.329 | -0.108 | 0.633 | -0.165 | 0.462 | 0.123 | 0.623 |
| sCD163 | 0.054 | 0.813 | 0.269 | 0.225 | 0.120 | 0.594 | 0.115 | 0.612 | -0.129 | 0.510 | 0.144 | 0.523 | -0.174 | 0.430 |
| IL-18 | 0.008 | 0.970 | 0.228 | 0.308 | 0.053 | 0.816 | -0.042 | 0.852 | -0.223 | 0.318 | 0.043 | 0.848 | -0.181 | 0.577 |
| IP-10 | 0.076 | 0.736 | 0.123 | 0.587 | 0.100 | 0.658 | -0.053 | 0.816 | 0.139 | 0.536 | 0.128 | 0.570 | 0.133 | 0.552 |
| sCD27 | 0.056 | 0.805 | 0.112 | 0.619 | 0.100 | 0.658 | -0.053 | 0.816 | 0.139 | 0.536 | 0.128 | 0.570 | 0.137 | 0.133 |
| MCP-1 | 0.236 | 0.204 | 0.216 | 0.232 | 0.140 | 0.606 | 0.119 | 0.660 | -0.019 | 0.944 | 0.218 | 0.418 | 0.187 | 0.529 |

Supplementary table 1 Correlation of Indexes of Quasispecies and Immune Cells Count, Liver enzymes, inflammatory cytokines of HBV mono-infection

*r*:correlation coefficient; P:P-value;ALT: alanine aminotransferase; AST: aspartate aminotransferase; sCD14: soluble Cluster of Differentiation 14; sCD163: soluble Cluster of Differentiation 163; IL-18: Interleukin-18; IP-10: Interferon-inducible protein-10; sCD27: soluble Cluster of Differentiation 27;MCP-1: monocyte chemoattractant protein 1.
